# Supplementary material for: Silicon–nickel intermetallic compounds supported on silica as a highly efficient catalyst for CO methanation
Source: Royal Society of Chemistry journal article supplement (doi:10.1039/c3cy00743j), 2013-11-11
Supplement: c3cy00743j.pdf [file c3cy00743j.pdf]

## Silicon-nickel intermetallic compounds supported on silica as a highly efficient catalyst for CO methanation

Xiao Chen, Jianhui Jin, Guangyan Sha, Chuang Li, Bingsen Zhang, Dangsheng Su, Christopher T. Williams\* and Changhai Liang\*

### Supplementary Information

Figure S1 shows the XRD patterns indicating that the  $\text{Ni}_3\text{Si}_2\text{O}_5(\text{OH})_4$  phase is very stable on the thermal calcinations in air at 400 °C and the reduction in hydrogen at 350 °C. Only a part of  $\text{Ni}_3\text{Si}_2\text{O}_5(\text{OH})_4$  was reduced to metallic Ni phase. However, the peaks due to  $\text{Ni}_3\text{Si}_2\text{O}_5(\text{OH})_4$  at 35° and 62° vanished with the increasing silicification temperature. Therefore, it can be concluded that the stable  $\text{Ni}_3\text{Si}_2\text{O}_5(\text{OH})_4$  phase can be reacted with  $\text{SiH}_4$  as the follow reaction:  $\text{Ni}_3\text{Si}_2\text{O}_5(\text{OH})_4 + \text{SiH}_4 \rightarrow \text{NiSi}_x + \text{SiO}_2 + \text{H}_2\text{O}$ .

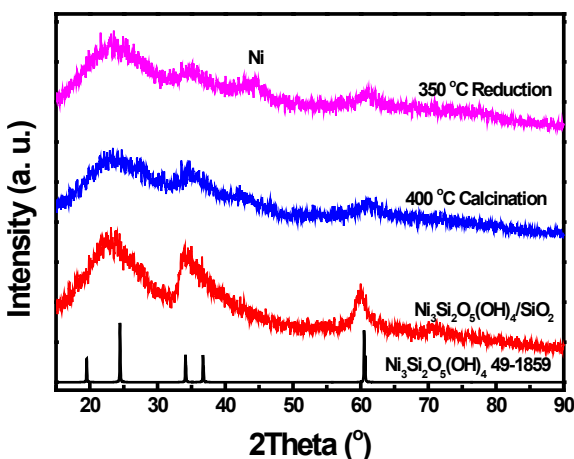

Fig. S1 XRD patterns of  $\text{Ni}_3\text{Si}_2\text{O}_5(\text{OH})_4/\text{SiO}_2$  precursor, calcined sample, and reduced sample.
